# Supplementary material for: Linking Sfl1 Regulation of Hyphal Development to Stress Response Kinases in Candida albicans
Source: PubMed Central journal article supplement (PMC6968649; doi:10.1128/msphere.00672-19), 2020-01-15
Supplement: mSphere.00672-19-st001.pdf [file mSphere.00672-19-st001.pdf]

| Strain                        | Genotype                                                                                                                                                                                                          | Source     |
|-------------------------------|-------------------------------------------------------------------------------------------------------------------------------------------------------------------------------------------------------------------|------------|
| <i>CAI4</i>                   | <i>ura3Δ::imm<sup>434</sup>/ura3Δ::imm<sup>434</sup></i>                                                                                                                                                          | 1          |
| <i>hog1</i>                   | <i>ura3Δ::imm<sup>434</sup>/ura3Δ::imm<sup>434</sup>, his1Δ::hisG/his1Δ::hisG, arg4Δ::hisG /arg4Δ::hisG, hog1Δ::ARG4/ hog1Δ::URA3</i>                                                                             | 2          |
| <i>pbs2</i>                   | <i>ura3Δ::imm<sup>434</sup>/ura3Δ::imm<sup>434</sup>, his1Δ::hisG/his1Δ::hisG, arg4Δ::hisG /arg4Δ::hisG, pbs2Δ::ARG4/ pbs2Δ::URA3</i>                                                                             | 2          |
| <i>sfl1</i>                   | <i>his1Δ/his1Δ, leu2Δ/ leu2Δ, arg4Δ/arg4Δ, ura3Δ/ura3Δ::imm<sup>434</sup>, iro1/iro1Δ::imm<sup>434</sup>, sfl1Δ::HIS1/sfl1Δ::LEU2</i>                                                                             | 3          |
| <i>rim101</i>                 | <i>his1Δ/his1Δ, leu2Δ/ leu2Δ, arg4Δ/arg4Δ, ura3Δ/ura3Δ::imm434, iro1/iro1Δ::imm434, rim101Δ::HIS1/rim101Δ::LEU2</i>                                                                                               | 3          |
| <i>ptp2ptp3</i>               | <i>his1Δ/his1Δ, leu2Δ/ leu2Δ, arg4Δ/arg4Δ, ura3Δ/ura3Δ::imm<sup>434</sup>, iro1/iro1Δ::imm<sup>434</sup>, ptp3Δ::C.dubliniensis HIS1/ptp3Δ::C.maltosa LEU2, ptp2Δ::URA3/ptp2Δ::ARG41</i>                          | 4          |
| <i>ptp2ptp3hog1</i>           | <i>his1Δ/his1Δ, leu2Δ/ leu2Δ, arg4Δ/arg4Δ, ura3Δ/ura3Δ::imm<sup>434</sup>, iro1/iro1Δ::imm434, ptp3Δ::C.dubliniensis HIS1/ptp3Δ::C.maltosa LEU2, ptp2Δ::ura3Δ/ptp2Δ::ARG4, hog1Δ::URA3/ hog1Δ::FRT</i>            | 4          |
| <i>CAI4 + HWP1p-GFP</i>       | <i>ura3Δ::1 imm<sup>434</sup>/ura3Δ:1 imm<sup>434</sup>, HWP1p/HWP1p-GFP-SAT1</i>                                                                                                                                 | this study |
| <i>hog1 + HWP1p-GFP</i>       | <i>ura3Δ::imm<sup>434</sup>/ura3Δ::imm<sup>434</sup>, his1Δ::hisG/his1Δ::hisG, arg4Δ::hisG /arg4Δ::hisG, hog1Δ::ARG4/ hog1Δ::URA3, HWP1p/HWP1p-GFP-SAT1</i>                                                       | this study |
| <i>pbs2 + HWP1p-GFP</i>       | <i>ura3Δ::imm<sup>434</sup>/ura3Δ::imm<sup>434</sup>, his1Δ::hisG/his1Δ::hisG, arg4Δ::hisG /arg4Δ::hisG, pbs2Δ::ARG4/ pbs2Δ::URA3, HWP1p/HWP1p-GFP-SAT1</i>                                                       | this study |
| <i>sfl1 + HWP1p-GFP</i>       | <i>his1Δ/his1Δ, leu2Δ/ leu2Δ, arg4Δ/arg4Δ, ura3Δ/ura3Δ::imm434, iro1/iro1Δ::imm434, sfl1Δ::HIS1/sfl1Δ::LEU2, HWP1p/HWP1p-GFP-SAT1</i>                                                                             | this study |
| <i>ptp2ptp3 + HWP1p-GFP</i>   | <i>his1Δ/his1Δ, leu2Δ/ leu2Δ, arg4Δ/arg4Δ, ura3Δ/ura3Δ::imm434, iro1/iro1Δ::imm434, ptp3Δ::C.dubliniensis HIS1/ptp3Δ::C.maltosa LEU2, ptp2Δ::URA3/ptp2Δ::ARG4, HWP1p/HWP1p-GFP-SAT1</i>                           | this study |
| <i>ptp2ptp3hog+ HWP1p-GFP</i> | <i>his1Δ/his1Δ, leu2Δ/ leu2Δ, arg4Δ/arg4Δ, ura3Δ/ura3Δ::imm434, iro1/iro1Δ::imm434, ptp3Δ::C.dubliniensis HIS1/ptp3Δ::C.maltosa LEU2, ptp2Δ::ura3Δ/ptp2Δ::ARG4, hog1Δ::URA3/ hog1Δ::FRT, HWP1p/HWP1p-GFP-SAT1</i> | this study |
| <i>CAI4+MAL2 p-NRG1-MYC</i>   | <i>ura3Δ::imm<sup>434</sup>/ura3Δ::imm<sup>434</sup>, ADE2/ade2Δ::MAL2p-NRG1-13MYC-URA3</i>                                                                                                                       | 4          |
| <b>References</b>             |                                                                                                                                                                                                                   |            |
| 1                             | Fonzi WA, Irwin MY. 1993. Isogenic strain construction and gene mapping in <i>Candida albicans</i> . <i>Genetics</i> <b>134</b> :717–28.                                                                          |            |
| 2                             | Blankenship JR, Fanning S, Hamaker JJ, Mitchell AP. 2010. An extensive circuitry for cell wall regulation in <i>Candida albicans</i> . <i>PLoS Pathog</i> <b>6</b> :e1000752.                                     |            |
| 3                             | Homann OR, Dea J, Noble SM, Johnson AD. 2009. A phenotypic profile of the <i>Candida albicans</i> regulatory network. <i>PLoS Genet</i> <b>5</b> :e1000783.                                                       |            |
| 4                             | Su C, Lu Y, Liu H. 2013. Reduced TOR signaling sustains hyphal development in <i>Candida albicans</i> by lowering Hog1 basal activity. <i>Mol Biol Cell</i> <b>24</b> :385–97.                                    |            |
| 5                             | Lu Y, Su C, Wang A, Liu H. 2011. Hyphal development in <i>Candida albicans</i> requires two temporally linked changes in promoter chromatin for initiation and maintenance. <i>PLoS Biol</i> <b>9</b> :e1001105.  |            |
