# Supplementary material for: Linking Sfl1 Regulation of Hyphal Development to Stress Response Kinases in Candida albicans
Source: PubMed Central journal article supplement (PMC6968649; doi:10.1128/msphere.00672-19), 2020-01-15
Supplement: mSphere.00672-19-st002.pdf [file mSphere.00672-19-st002.pdf]

## **Supplemental Table 2**

### **Primers used for qRT-PCR**

ACT1 qPCR(F): TGGTGATGGTGTTACTCACG

ACT1 qPCR (R): GACAATTTCTCTTTCAGCAC

CDC28 qPCR (F): TGGATTAGCTCGAGCATTG

CDC28 qPCR (R): GGGTAGATATGTGGTCTGTTGG

NRG1 qPCR (F): GAATTCAAACCATCAACCAA

NRG1 qPCR (R): TGATTGTTGTGACAATGGAG

BRG1 qPCR (F): AGCTGGTGTGCCACCTCCAC

BRG1 qPCR (R): TACCACACCTGTGACATCTG

UME6 qPCR (F): TCTTACCTCAATCAGCATTA

UME6 qPCR (R): CAGCACTAACACTGACACC

### **Primers used for HWP1p-GFP Cloning:**

HWP1p-GFP-NAT (F):

GCCAGTGAATTGTAATACGACTCACTATAGGGCGAATTGCCTTACACGCACA  
TAAATTGC

HWP1p-GFP-NAT R:

ACACCAGTGAATAATTCTTCACCTTTAGACATTTTAATAATTGACGAAACTAA  
AAGC
